# Supplementary material for: Is acute idiopathic pericarditis associated with recent upper respiratory tract infection or gastroenteritis? A case–control study
Source: HighWire-hosted journal article supplement (doi:10.1136/bmjopen-2015-009141), 2015-11-01
Supplement: bmjopen-2015-009141supp_appendix2.pdf [file bmjopen-2015-009141supp_appendix2.pdf]

ANAMNESE PAR SYSTEMECARDIO-VASCULAIRE

|                         | non                      | oui                      |
|-------------------------|--------------------------|--------------------------|
| Précordialgies au repos | <input type="checkbox"/> | <input type="checkbox"/> |
| à l'effort              | <input type="checkbox"/> | <input type="checkbox"/> |
| Dyspnée au repos        | <input type="checkbox"/> | <input type="checkbox"/> |
| à l'effort              | <input type="checkbox"/> | <input type="checkbox"/> |
| paroxystique noct.      | <input type="checkbox"/> | <input type="checkbox"/> |
| Orthopnée               | <input type="checkbox"/> | <input type="checkbox"/> |
| Oedèmes                 | <input type="checkbox"/> | <input type="checkbox"/> |
| Nycturie                | <input type="checkbox"/> | <input type="checkbox"/> |
| Claudication            | <input type="checkbox"/> | <input type="checkbox"/> |
| H T A                   | <input type="checkbox"/> | <input type="checkbox"/> |

RESPIRATOIRE

|                        |                          |                          |
|------------------------|--------------------------|--------------------------|
| Infections antérieures | <input type="checkbox"/> | <input type="checkbox"/> |
| Toux                   | <input type="checkbox"/> | <input type="checkbox"/> |
| Expectorations         | <input type="checkbox"/> | <input type="checkbox"/> |
| Hémoptysies            | <input type="checkbox"/> | <input type="checkbox"/> |
| Douleurs thoraciques   | <input type="checkbox"/> | <input type="checkbox"/> |
| Infections O R L       | <input type="checkbox"/> | <input type="checkbox"/> |

DIGESTIF

|                           |                          |                          |
|---------------------------|--------------------------|--------------------------|
| Perte de poids            | <input type="checkbox"/> | <input type="checkbox"/> |
| Inappétence               | <input type="checkbox"/> | <input type="checkbox"/> |
| Intolérance alimentaire   | <input type="checkbox"/> | <input type="checkbox"/> |
| Brûlures                  | <input type="checkbox"/> | <input type="checkbox"/> |
| Dysphagie, régurgitations | <input type="checkbox"/> | <input type="checkbox"/> |
| Nausées                   | <input type="checkbox"/> | <input type="checkbox"/> |
| Vomissements              | <input type="checkbox"/> | <input type="checkbox"/> |
| Hématémèse                | <input type="checkbox"/> | <input type="checkbox"/> |
| Douleurs abdominales      | <input type="checkbox"/> | <input type="checkbox"/> |
| Ictère                    | <input type="checkbox"/> | <input type="checkbox"/> |
| Constipation              | <input type="checkbox"/> | <input type="checkbox"/> |
| Diarrhées                 | <input type="checkbox"/> | <input type="checkbox"/> |
| Melena                    | <input type="checkbox"/> | <input type="checkbox"/> |
| Sang frais                | <input type="checkbox"/> | <input type="checkbox"/> |
| Aspect. pathol. selles    | <input type="checkbox"/> | <input type="checkbox"/> |

URINAIRE

|                        |                          |                          |
|------------------------|--------------------------|--------------------------|
| Infections antérieures | <input type="checkbox"/> | <input type="checkbox"/> |
| Dysurie                | <input type="checkbox"/> | <input type="checkbox"/> |
| Pollakiurie            | <input type="checkbox"/> | <input type="checkbox"/> |
| Hématurie              | <input type="checkbox"/> | <input type="checkbox"/> |
| Incontinence           | <input type="checkbox"/> | <input type="checkbox"/> |

| <u>GENITAL</u>            | non                      | oui                      |
|---------------------------|--------------------------|--------------------------|
| Ménarche, ménopause       | .....                    | .....                    |
| Cycles, menstruations     | .....                    | .....                    |
| Accouchements, abortus    | .....                    | .....                    |
| Pertes vaginales          | <input type="checkbox"/> | <input type="checkbox"/> |
| <u>LOCOMOTEUR</u>         |                          |                          |
| Arthralgies               | <input type="checkbox"/> | <input type="checkbox"/> |
| Tuméfactions articulaires | <input type="checkbox"/> | <input type="checkbox"/> |
| Douleurs osseuses         | <input type="checkbox"/> | <input type="checkbox"/> |
| Myalgies                  | <input type="checkbox"/> | <input type="checkbox"/> |
| <u>NEUROLOGIQUE</u>       |                          |                          |
| Céphalées                 | <input type="checkbox"/> | <input type="checkbox"/> |
| Vertiges                  | <input type="checkbox"/> | <input type="checkbox"/> |
| Paresthésies              | <input type="checkbox"/> | <input type="checkbox"/> |
| Paralysies                | <input type="checkbox"/> | <input type="checkbox"/> |
| Troubles visuels          | <input type="checkbox"/> | <input type="checkbox"/> |
| Troubles auditifs         | <input type="checkbox"/> | <input type="checkbox"/> |
| Perte de connaissance     | <input type="checkbox"/> | <input type="checkbox"/> |
| Troubles du sommeil       | <input type="checkbox"/> | <input type="checkbox"/> |
| <u>DIVERS</u>             |                          |                          |
| Asthénie                  | <input type="checkbox"/> | <input type="checkbox"/> |
| Fièvre                    | <input type="checkbox"/> | <input type="checkbox"/> |
| Frissons                  | <input type="checkbox"/> | <input type="checkbox"/> |
| Transpiration             | <input type="checkbox"/> | <input type="checkbox"/> |
| Soif                      | <input type="checkbox"/> | <input type="checkbox"/> |
| Diathèse hémorragique     | <input type="checkbox"/> | <input type="checkbox"/> |
| Lésions cutanées          | <input type="checkbox"/> | <input type="checkbox"/> |
| Prurit                    | <input type="checkbox"/> | <input type="checkbox"/> |
| Allergies                 | <input type="checkbox"/> | <input type="checkbox"/> |
| <u>HABITUDES</u>          |                          |                          |
| Alcool                    | <input type="checkbox"/> | <input type="checkbox"/> |
| Tabac                     | <input type="checkbox"/> | <input type="checkbox"/> |

Médicaments  
 (antalgiques, contraceptifs) .....

.....

Situation sociale  
 .....

.....
